# Supplementary material for: Deoxynivalenol and Its Modified Forms: Are There Major Differences?
Source: MDPI journal article supplement (doi:10.3390/toxins8110334), 2016-11-16
Supplement: s1 [file s1]

# Supplementary Materials: Deoxynivalenol and Its Modified Forms: Are There Major Differences?

Arash Alizadeh, Saskia Braber, Peyman Akbari, Aletta Kraneveld, Johan Garssen and Johanna Fink-Gremmels

Comparison of Lactate dehydrogenase (LDH) leakage induced by DON, DON3G and DOM-1.

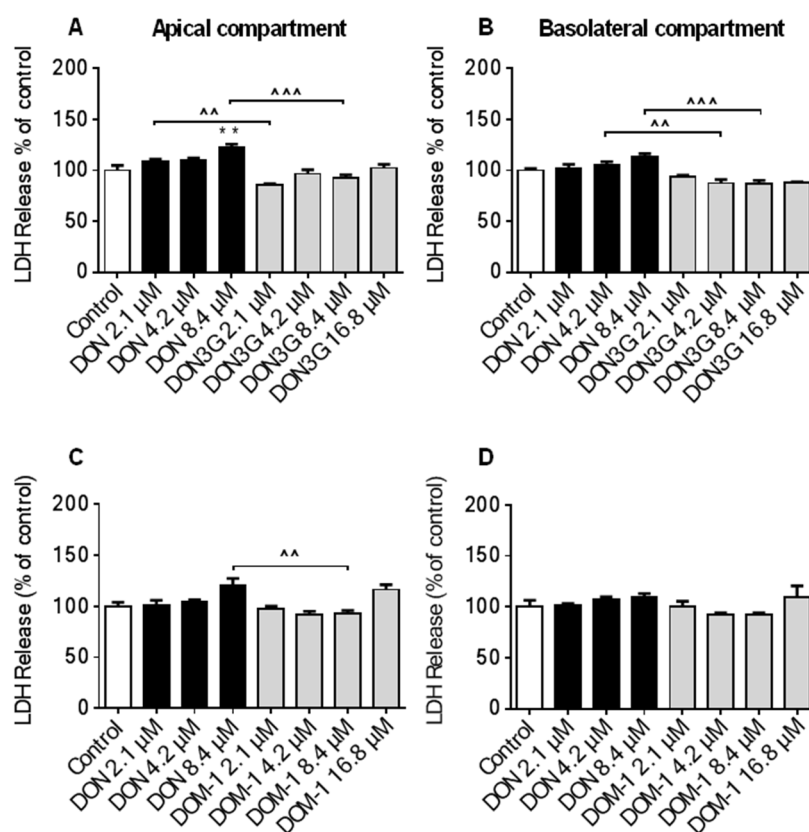

**Figure S1.** Cytotoxic effects of DON, DON3G and DOM-1 in Caco-2 cells. Differentiated Caco-2 cells on transwell inserts were exposed from the apical and basolateral compartment to increasing DON, DON3G (A,B) and DOM-1 (C,D) concentrations (2.1, 4.2, 8.4, 16.8  $\mu$ M) for 24 h followed by evaluation of LDH release into the apical (A,C) and basolateral (B,D) compartment. Results are expressed as a percentage of LDH released by the control group as mean  $\pm$  SEM. \*\*  $p < 0.01$ ; significantly different from control group; ^^  $p < 0.01$ , ^^^  $p < 0.001$  significantly different from corresponding DON group.
